# Supplementary material
Source: PubMed Central journal article supplement (PMC7518461)
Supplement: NIHMS1587135-supplement-1.pdf [file NIHMS1587135-supplement-1.pdf]

**Supplemental Table:** Vaccination rates 8 weeks after the study start, and unadjusted and adjusted risk ratios for early influenza vaccination by patient characteristics and study arm

|                                   | Category             | n by category | Vaccinated per category, (%) | Unadjusted Risk Ratio    | Adjusted Risk Ratio      |
|-----------------------------------|----------------------|---------------|------------------------------|--------------------------|--------------------------|
| <b>New York</b>                   |                      |               |                              |                          |                          |
| <b>Age category</b>               | 6 months – 1.9 years | 3967          | 33.8                         | <b>2.29 [2.14, 2.45]</b> | 2.17 [2.03, 2.32]        |
|                                   | 2 - 5.9 years        | 13620         | 21.1                         | <b>1.44 [1.37, 1.52]</b> | 1.08 [1.03, 1.13]        |
|                                   | 6 - 10.9 years       | 18728         | 17.3                         | <b>1.17 [1.12, 1.23]</b> | 1.09 [1.04, 1.14]        |
|                                   | 11 - 17.9 years      | 25616         | 14.9                         | -Reference-              | -Reference-              |
| <b>Practice type</b>              | Family Medicine      | 7273          | 12.9                         | -Reference-              | -Reference-              |
|                                   | Pediatrics           | 49390         | 19.1                         | <b>1.49 [1.21, 1.84]</b> | 1.29 [1.10, 1.52]        |
|                                   | CHC/RHC              | 5268          | 13.2                         | 1.11 [0.78, 1.58]        | 0.92 [0.70, 1.20]        |
| <b>Rurality</b>                   | Downstate            | 27456         | 17.4                         | -Reference-              | -Reference-              |
|                                   | Upstate rural        | 8540          | 17.6                         | <b>0.91 [0.71, 1.17]</b> | 1.07 [0.90, 1.27]        |
|                                   | Upstate urban        | 25935         | 20.0                         | 1.07 [0.89, 1.29]        | 1.14 [1.00, 1.30]        |
| <b>Vaccinated in last 2 years</b> | Unvaccinated         | 36974         | 5.6                          | -Reference-              | -Reference-              |
|                                   | Vaccinated           | 24957         | 36.6                         | <b>6.27 [5.97, 6.59]</b> | 6.29 [5.98, 6.61]        |
| <b>Study Arm</b>                  | Autodialer           | 19003         | 18.9                         | <b>1.06 [1.01, 1.11]</b> | 1.06 [1.01, 1.11]        |
|                                   | Text                 | 19090         | 18.6                         | 1.04 [1.00, 1.09]        | 1.04 [0.99, 1.09]        |
|                                   | Mail                 | 4779          | 16.4                         | 0.91 [0.84, 0.99]        | 0.90 [0.83, 0.98]        |
|                                   | Usual care           | 19059         | 18.0                         | -Reference-              | -Reference-              |
| <b>Colorado</b>                   |                      |               |                              |                          |                          |
| <b>Age category</b>               | 6 months – 1.9 years | 1,952         | 42.9                         | <b>2.57 (2.30, 2.87)</b> | <b>2.25 (2.09, 2.41)</b> |
|                                   | 2 - 5.9 years        | 5,810         | 24.6                         | <b>1.47 (1.31, 1.66)</b> | <b>1.14 (1.07, 1.22)</b> |
|                                   | 6 - 10.9 years       | 6,534         | 20.4                         | <b>1.22 (1.11, 1.34)</b> | <b>1.16 (1.09, 1.24)</b> |
|                                   | 11 - 17.9 years      | 9,549         | 16.7                         | -Reference-              | -Reference-              |
| <b>Practice type</b>              | Family Medicine      | 6,451         | 19.6                         | -Reference-              | -Reference-              |
|                                   | Pediatrics           | 15,071        | 23.0                         | 1.18 (0.91, 1.53)        | <b>1.19 (1.03, 1.37)</b> |
|                                   | CHC/RHC              | 2,323         | 20.1                         | 1.03 (0.81, 1.30)        | 1.08 (0.92, 1.27)        |
| <b>Rurality</b>                   | Metro                | 11,083        | 25.2                         | -Reference-              | -Reference-              |
|                                   | North                | 5,431         | 21.8                         | 0.87 (0.70, 1.07)        | 1.06 (0.94, 1.21)        |
|                                   | South                | 7,331         | 16.8                         | <b>0.67 (0.48, 0.92)</b> | 0.85 (0.69, 1.05)        |
| <b>Vaccinated in last 2 years</b> | Unvaccinated         | 13,388        | 8.4                          | -Reference-              | -Reference-              |
|                                   | Vaccinated           | 10,457        | 39.0                         | <b>4.67 (4.23, 5.16)</b> | <b>4.35 (3.96, 4.79)</b> |
| <b>Study Arm</b>                  | Autodialer           | 7,910         | 23.3                         | <b>1.16 (1.10, 1.22)</b> | <b>1.13 (1.08, 1.19)</b> |
|                                   | Mail                 | 8,007         | 22.0                         | <b>1.09 (1.03, 1.15)</b> | <b>1.10 (1.05, 1.15)</b> |
|                                   | Usual care           | 7,928         | 20.2                         | -Reference-              | -Reference-              |
